# Supplementary material for: Characterization of the Water Shortage Effects on Potato Tuber Tissues during Growth Using MRI Relaxometry and Biochemical Parameters
Source: MDPI journal article supplement (doi:10.3390/plants11151918), 2022-07-25
Supplement: s1 [file s1]

## Supplementary Materials

Supplementary Figure S1

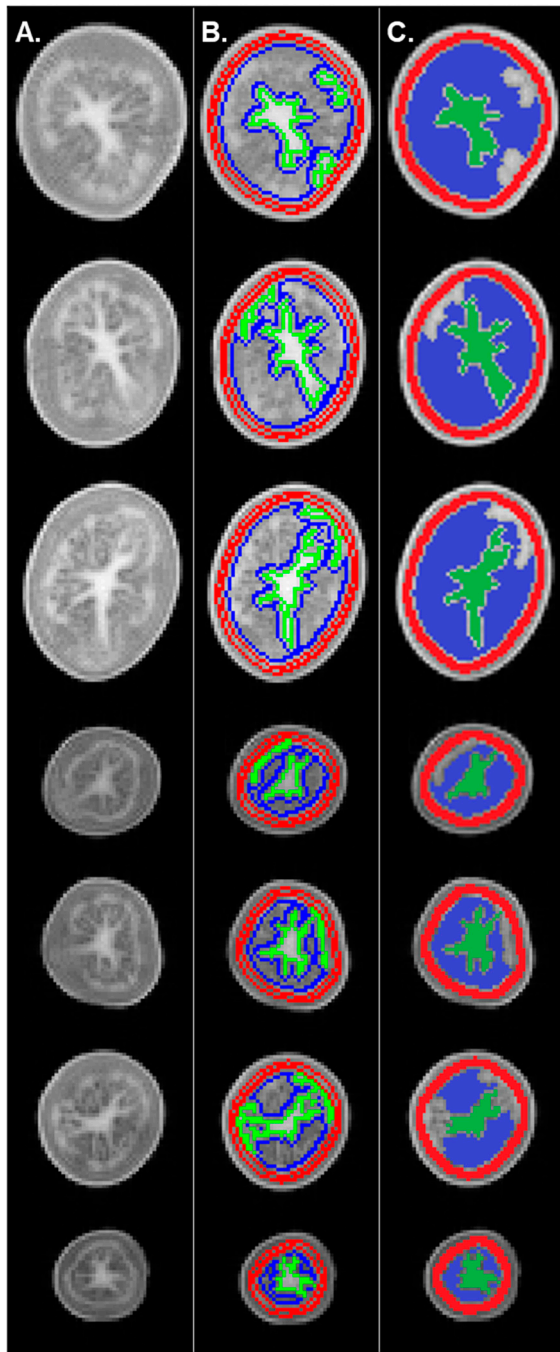

**Supplementary Figure S1.** **A.** Multi-spin-echo MRI images (echo time = 130 ms, repetition time = 10 s,  $0.8 \times 0.8 \times 5 \text{ mm}^3$  voxel) of potato tubers at 60 days after shoot emergence (DASE). **B.** Masks of the three different tissues (cortex, pith, flesh) obtained by means of an automatic segmentation algorithm developed for transverse relaxation time ( $T_2$ ) computation. **C.** The three different regions obtained following segmentation according to  $T_2$ : cortex (red), flesh (blue) and pith (green).

## Supplementary Figure S2

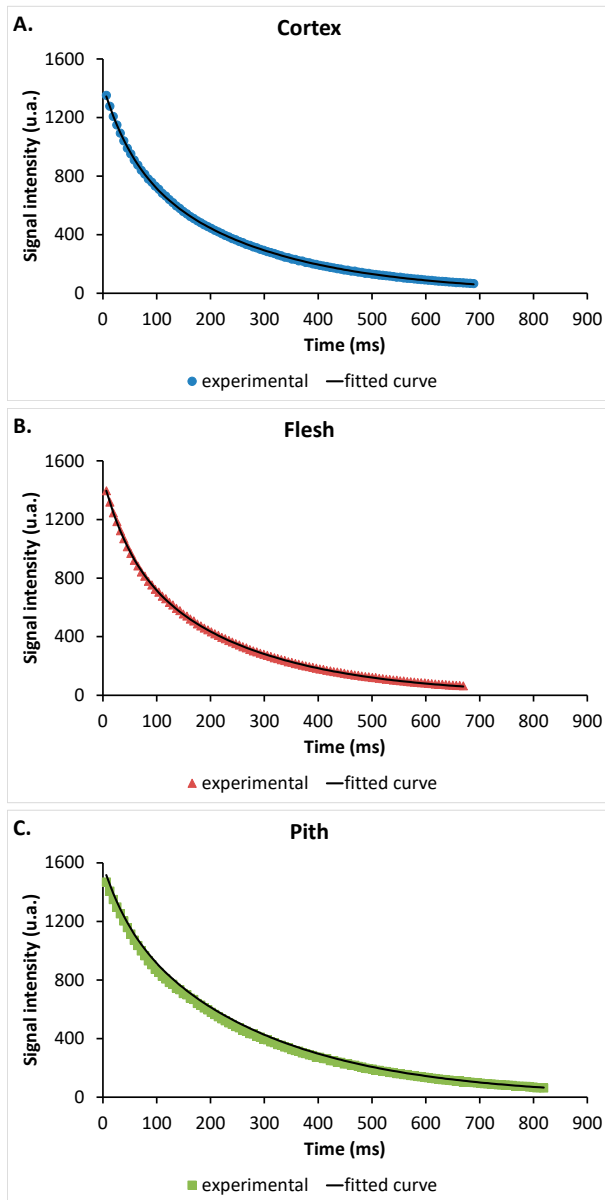

**Supplementary Figure S2.** T<sub>2</sub> decay curves generated from the computation of the mean signal in selected tuber tissue regions of interest (**A.** Cortex, **B.** Flesh, **C.** Pith) from all Mutli-Spin Echo sequence images. Values corresponding to a signal-to-noise ratio lower than 7 were removed from the T<sub>2</sub> curves before fitting according to the Levenberg-Marquardt algorithm using TableCurve software. Optimal fitting was reached using a bi-exponential model.

### Supplementary Figure S3

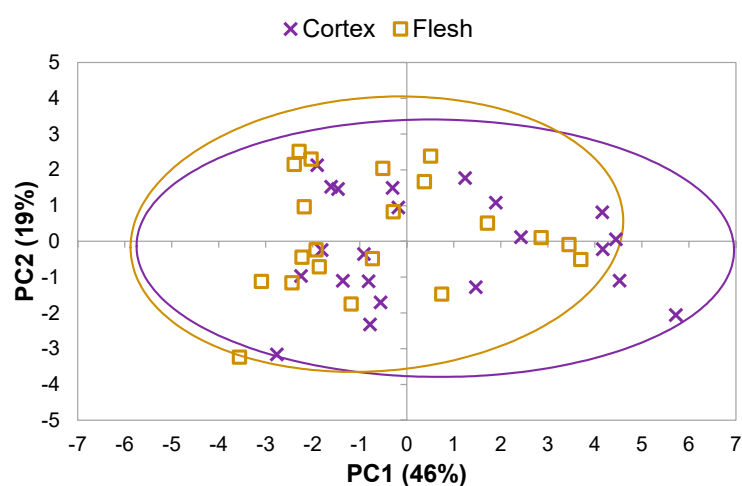

**Supplementary Figure S3.** Principal component analysis (PCA) score plot derived from data obtained from MRI relaxometry and physiological measurements of potato tuber tissues using principal components 1 (PC1) and 2 (PC2). Sample scores are differentiated by colour and symbol to indicate sample classification according to tissue type. Continuous lines shown on the score plot represent the ellipsis of confidence at 95% for each group.

**Supplementary Figure S4**

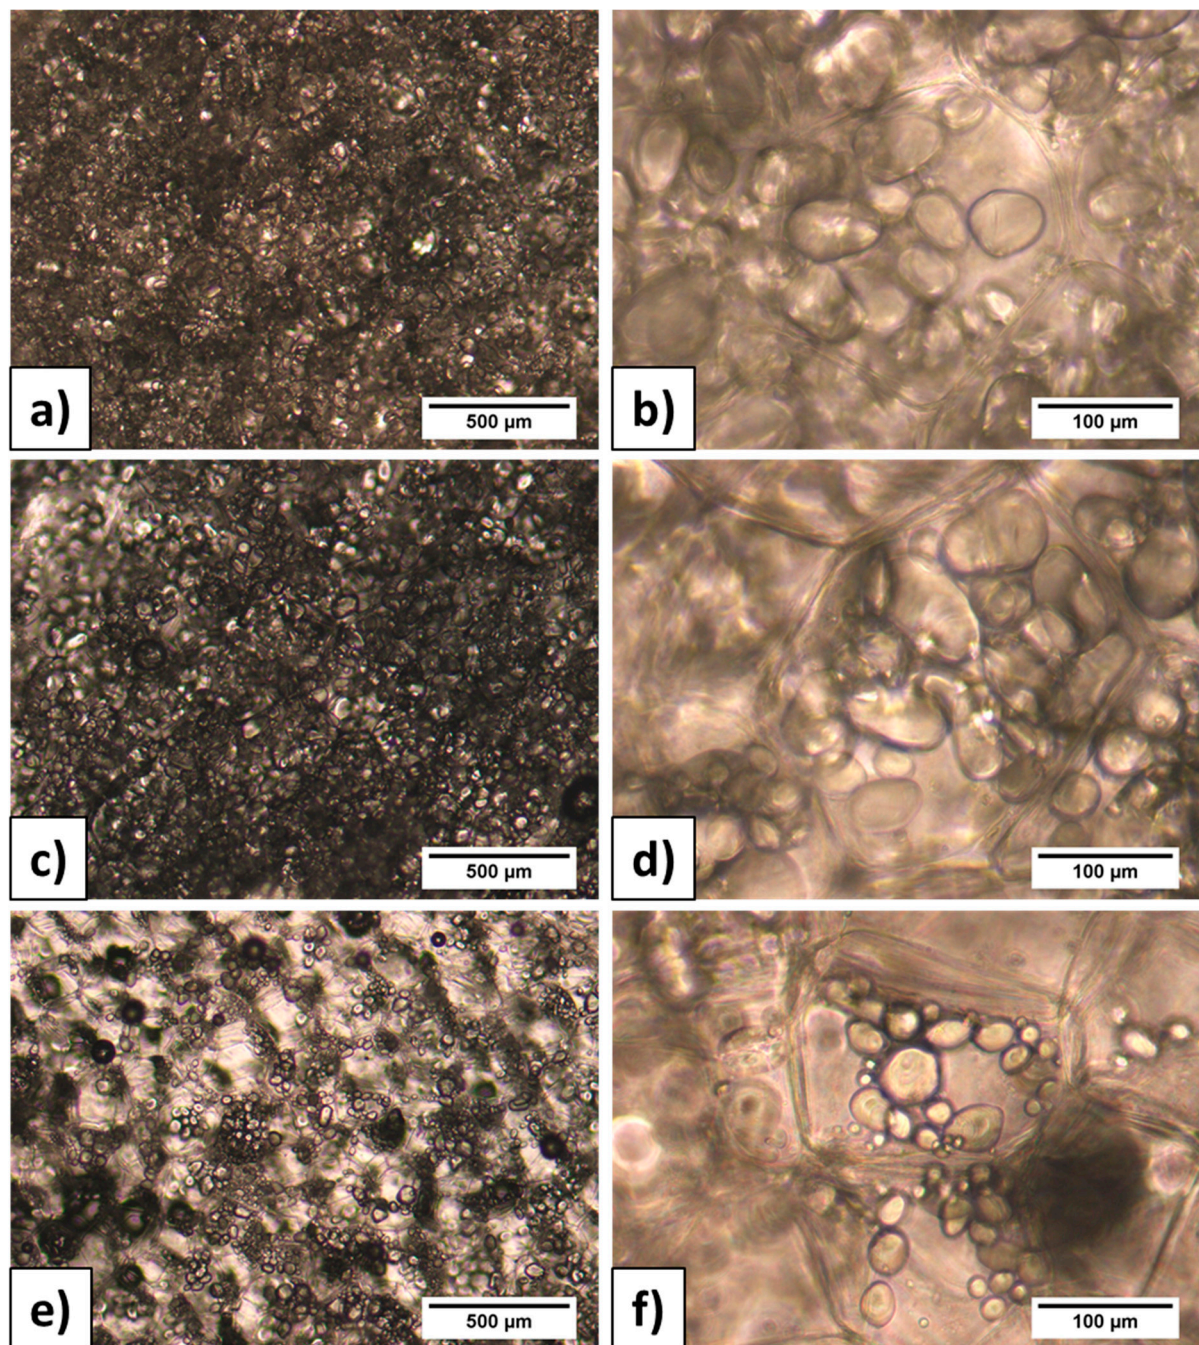

**Supplementary Figure S4:** Optical micrographs obtained using a Nikon Eclipse 80i of a 1 mm-thick slice of potato tissue of the cortex (**a** and **b**), the perimedullary region (**c** and **d**) and the pith (**e** and **f**) of the potato tuber. The tissue was washed with water to remove all excess starch.



**Supplementary Figure S5**

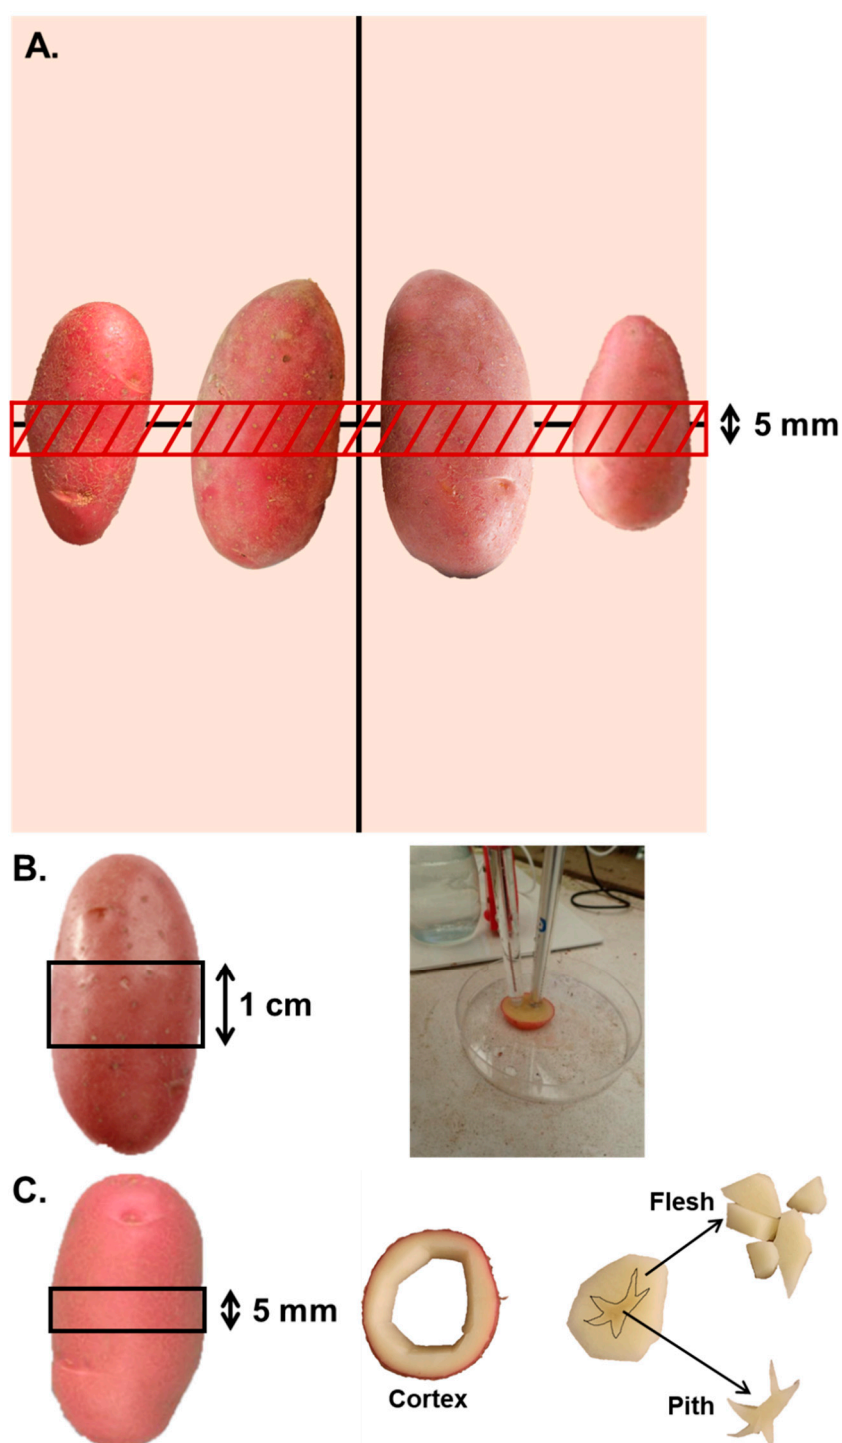

**Supplementary Figure S5.** **A.** Arrangement of potato tubers on a rectangular tray designed for insertion in a box placed in the temperature-regulating device installed inside an RF coil for transverse relaxation time measurements by MRI. **B.** Redox-potential measurement of tissue from the cross section of a potato tuber. **C.** Separation of tissues in a potato slice for metabolite analysis.
